# Supplementary material for: Specific Deoxyceramide Species Correlate with Expression of Macular Telangiectasia Type 2 (MacTel2) in a SPTLC2 Carrier HSAN1 Family
Source: MDPI journal article supplement (doi:10.3390/genes14040931), 2023-04-18
Supplement: s1 [file s1]

| Species           | HSAN1 Affected |          |          |          |         |          | Control  |         |          |         |          |
|-------------------|----------------|----------|----------|----------|---------|----------|----------|---------|----------|---------|----------|
|                   | 3              | 4        | 5        | 6        | 7       | 9        | 8        | 10      | 13*      | 14*     | 20       |
| Deoxysphingosine  | 0.895          | 1.156    | 1.628    | 1.507    | 1.137   | 1.365    | 0.591    | 0.674   | 0.402    | 0.553   | 0.374    |
| Deoxysphinganine  | 0.463          | 0.661    | 0.980    | 1.007    | 0.365   | 0.488    | 0.200    | 0.297   | 0.133    | 0.237   | 0.130    |
| Sphingosine (C16) | 13.041         | 18.225   | 14.254   | 25.761   | 17.399  | 23.715   | 16.512   | 12.667  | 18.723   | 13.332  | 19.743   |
| Sphinganine (C16) | 0.206          | 0.491    | 0.340    | 0.316    | 0.199   | 0.370    | 0.165    | 0.147   | 0.247    | 0.194   | 0.259    |
| Sphingosine (C18) | 49.234         | 88.283   | 54.883   | 100.425  | 60.368  | 67.224   | 78.972   | 61.986  | 69.713   | 68.429  | 68.647   |
| Sphinganine (C18) | 1.749          | 3.569    | 2.538    | 3.007    | 1.912   | 3.508    | 2.064    | 1.436   | 2.240    | 2.252   | 2.904    |
| Cer(18:0/16:0)    | 5.093          | 6.464    | 7.487    | 12.019   | 3.804   | 6.806    | 5.269    | 4.323   | 8.781    | 3.855   | 11.593   |
| Cer(d18:0/18:1)   |                |          | 3.471    |          | 0.227   | 0.841    | 0.248    | 1.006   | 0.215    | 0.251   | 0.279    |
| Cer(d18:0/18:2)   | 2.992          | 2.221    | 12.749   | 23.850   | 5.905   | 9.829    | 16.044   | 3.679   | 8.682    | 9.933   | 16.294   |
| Cer(d18:0/20:0)   | 2.106          | 3.996    | 2.644    | 2.088    | 0.405   | 0.631    | 1.613    |         | 4.216    | 0.572   | 4.547    |
| Cer(d18:0/20:4)   | 32.122         | 52.827   | 112.457  | 405.247  | 90.668  | 170.728  | 276.671  | 46.266  | 91.534   | 289.709 | 273.314  |
| Cer(d18:0/24:0)   | 26.787         | 72.422   | 91.213   | 83.273   | 37.345  | 52.696   | 62.610   | 30.031  | 333.596  | 33.700  | 277.329  |
| Cer(d18:0/24:1)   | 4.685          | 1.006    | 1.051    | 6.117    | 4.364   | 8.047    | 8.466    | 5.311   | 20.592   | 2.342   | 33.905   |
| Cer(d18:0/26:0)   |                | 1.967    | 1.397    | 1.541    | 0.448   | 0.975    | 0.963    | 0.747   | 5.347    | 0.488   | 3.001    |
| Cer(d18:0/26:1)   |                | 4.758    | 2.302    | 2.994    |         |          | 0.713    | 1.092   | 11.973   |         | 3.108    |
| Cer(d18:1/16:0)   | 142.966        | 197.111  | 148.214  | 140.538  | 99.752  | 237.357  | 113.833  | 149.953 | 400.105  | 78.515  | 600.735  |
| Cer(d18:1/18:0)   | 27.206         | 55.120   | 70.070   | 57.970   | 52.001  | 51.332   | 35.554   | 26.743  | 63.423   | 17.712  | 49.424   |
| Cer(d18:1/20:0)   | 31.235         | 80.067   | 173.191  | 68.432   | 67.215  | 67.406   | 65.584   | 65.633  | 209.015  | 32.943  | 148.538  |
| Cer(d18:1/24:0)   | 1050.920       | 2629.447 | 2407.073 | 1226.999 | 818.531 | 1099.352 | 1233.406 | 721.930 | 8545.707 | 567.155 | 7544.318 |
| Cer(d18:1/24:1)   | 491.805        | 1015.916 | 1083.175 | 548.923  | 432.859 | 916.241  | 542.285  | 412.446 | 2000.564 | 116.709 | 2305.476 |
| Cer(d18:1/26:0)   | 21.748         | 43.144   | 42.948   | 25.336   | 15.638  | 14.755   | 20.509   | 19.299  | 284.518  | 11.060  | 145.068  |
| Cer(d18:1/26:1)   | 6.805          | 20.763   | 20.721   | 5.635    | 6.020   | 7.334    | 10.748   | 10.303  | 70.677   | 1.690   | 52.195   |
| Cer(m18:0/16:0)   | 9.483          | 6.164    | 20.040   | 8.928    | 5.320   | 7.177    | 1.495    | 2.891   | 2.197    | 2.134   | 1.464    |
| Cer(m18:0/18:0)   | 16.235         | 41.071   | 142.472  | 44.875   | 20.641  | 28.035   | 6.137    | 14.530  | 13.656   | 3.814   | 11.551   |
| Cer(m18:0/18:2)   |                |          | 12.662   | 17.011   | 4.859   | 4.936    | 2.107    | 3.705   | 1.159    | 3.034   | 4.003    |
| Cer(m18:0/20:0)   | 38.983         | 43.080   | 152.792  | 39.561   | 23.054  | 29.071   | 8.277    | 16.535  | 21.327   | 4.847   | 18.540   |
| Cer(m18:0/20:4)   | 1.870          | 4.040    | 10.310   | 23.949   | 7.865   | 12.550   | 2.016    | 3.168   | 1.544    | 6.181   | 5.920    |

|                  |        |         |         |         |        |        |        |        |         |        |         |
|------------------|--------|---------|---------|---------|--------|--------|--------|--------|---------|--------|---------|
| Cer(m18:0/24:0)  | 85.609 | 135.384 | 306.970 | 101.169 | 51.039 | 54.180 | 17.973 | 38.105 | 224.332 | 14.038 | 163.879 |
| Cer(m18:0/24:1)  | 52.406 | 128.464 | 194.975 | 51.788  | 32.646 | 38.245 | 9.679  | 40.300 | 142.961 | 6.172  | 63.627  |
| Cer(m18:0/26:1)  | 37.785 | 17.393  | 11.694  | 48.834  | 23.669 | 34.651 | 51.434 | 25.768 | 11.750  | 52.194 | 36.373  |
| Cer(m18:1/16:0)  | 2.194  | 1.800   | 4.661   | 3.520   | 3.377  | 2.973  | 1.855  |        | 5.034   | 0.479  | 6.203   |
| Cer(m18:1/18:0)  | 18.442 | 22.530  | 57.052  | 23.749  | 19.336 | 25.301 | 3.840  | 4.576  | 4.835   | 3.509  | 3.962   |
| Cer(m18:1/20:0)  | 32.004 | 68.210  | 235.888 | 75.381  | 60.447 | 82.984 | 41.612 | 49.461 | 89.906  | 21.606 | 96.061  |
| Cer(m18:1/24:0)  | 52.465 | 109.294 | 257.327 | 87.631  | 85.385 | 90.076 | 22.363 | 39.614 | 271.229 | 21.939 | 153.564 |
| Cer(m18:1/24:1)  | 39.078 | 83.292  | 219.579 | 60.617  | 70.815 | 81.782 | 15.115 | 29.706 | 103.155 | 6.434  | 71.730  |
| Cer(m18:1/26:0)  |        | 3.738   | 5.440   | 3.696   | 3.629  | 1.806  | 1.777  |        | 12.417  |        | 9.161   |
| Cer(m18:1/26:1)  |        | 4.645   | 3.174   | 0.177   |        | 0.863  |        | 0.921  | 5.593   |        | 2.408   |
| Cer(dm17:0/16:0) |        |         | 1.099   | 1.911   | 1.056  | 1.209  | 1.768  | 1.570  | 1.488   | 1.685  | 1.804   |
| Cer(dm17:0/20:4) |        | 1.698   | 4.998   | 15.049  | 3.513  | 6.932  | 1.218  | 1.716  | 0.902   | 1.844  | 2.372   |
| Cer(dm17:0/24:0) | 12.386 | 10.342  | 53.690  | 18.495  | 20.267 | 23.219 | 7.675  |        | 103.105 | 3.172  | 55.444  |
| Cer(dm17:0/24:1) |        |         | 0.308   | 1.297   | 0.271  | 0.467  | 0.207  |        | 2.903   | 0.168  | 1.261   |
| Cer(dm17:0/26:0) |        |         | 1.690   | 2.332   | 1.157  | 1.037  | 0.696  |        | 4.774   | 0.807  | 3.131   |
| Cer(dm17:1/24:0) |        | 1.467   | 48.322  | 34.958  | 24.967 | 35.069 | 9.467  | 1.174  | 41.909  | 4.038  | 16.166  |
| Cer(dm17:1/26:0) |        |         | 3.347   | 2.497   | 1.594  | 2.223  | 0.910  |        | 23.056  | 0.092  | 7.107   |
| Cer(dm17:1/26:1) |        |         | 0.572   | 4.333   | 1.948  | 1.296  | 2.649  | 0.574  | 15.864  | 2.003  | 9.197   |

**Table S1.** Plasma Sphingolipid bases, Ceramides, Deoxyceramides, and Deoxymethylceramides in participants with and without HSAN1. Ceramide species are denoted “Cer(d##/###)”, Deoxyceramides are denoted “Cer(m##/###)”, and Deoxymethylceramides are denoted by “Cer(dm##/###)”.

\* Control participants that are NOT members of this family
